# Supplementary material
Source: ML conference proceedings conference paper supplement (https://proceedings.mlr.press/v97/zhou19b.html)
Supplement: Supplementary file [file zhou19b-supp.pdf]

## A. Proofs of Theorems 4.2 and 4.7

### A.1. Proof of Theorem 4.2

We need the following lemma to guarantee an  $\Omega(n)$  lower bound for finding an  $\epsilon$ -suboptimal solution when  $F$  is convex.

**Lemma A.1.** For any linear-span randomized first-order algorithm  $\mathcal{A}$  and any  $L, \sigma, n, \Delta, \epsilon$  with  $\epsilon < \Delta/4$ , there exist functions  $\{f_i\}_{i=1}^n : \mathbb{R}^n \rightarrow \mathbb{R}$  and  $F = \sum_{i=1}^n f_i/n$  which satisfy that  $\{f_i\}_{i=1}^n \in \mathcal{V}^{(L)}$ ,  $F \in \mathcal{S}^{(0,L)}$  and  $F(\mathbf{x}^{(0)}) - \inf_{\mathbf{x} \in \mathbb{R}^n} F(\mathbf{x}) \leq \Delta$ . In order to find  $\hat{\mathbf{x}} \in \mathbb{R}^n$  such that  $\mathbb{E}F(\hat{\mathbf{x}}) - \inf_{\mathbf{x} \in \mathbb{R}^n} F(\mathbf{x}) \leq \epsilon$ ,  $\mathcal{A}$  needs at least  $\Omega(n)$  IFO calls.

*Proof of Theorem 4.2.* Let  $\{\mathbf{U}^{(i)}\}_{i=1}^n \in \mathcal{O}(2T-1, (2T-1)n, n)$ . We choose  $\bar{f}_i(\mathbf{x}) : \mathbb{R}^{Tn} \rightarrow \mathbb{R}$  as follows:

$$\begin{aligned}\bar{f}_i(\mathbf{x}) &:= \sqrt{n} f_{\mathcal{N}_c}(\mathbf{U}^{(i)} \mathbf{x}; \alpha, T), \\ \bar{F}(\mathbf{x}) &:= \frac{1}{n} \sum_{i=1}^n \bar{f}_i(\mathbf{x}).\end{aligned}$$

We have the following properties. First, we claim that  $\{\bar{f}_i(\mathbf{x})\} \in \mathcal{V}^{(1)}$  because of Lemma 5.1 where  $f_{\mathcal{N}_c} \in \mathcal{S}^{(0,1)} \subset \mathcal{S}^{(-1,1)}$ . Next, suppose that  $\bar{\mathcal{X}}^* = \operatorname{argmin}_{\mathbf{z}} \bar{F}(\mathbf{z})$ , then by definition, we have that for any  $\bar{\mathbf{x}}^* \in \bar{\mathcal{X}}^*$ ,  $\mathbf{U}^{(i)} \bar{\mathbf{x}}^* \in (\bar{\mathcal{X}}^*)^{(i)}$ , where  $(\bar{\mathcal{X}}^*)^{(i)} = \operatorname{argmin}_{\mathbf{z}} f_{\mathcal{N}_c}(\mathbf{z}; \alpha, T)$ . Thus, we have

$$\operatorname{dist}^2(0, \bar{\mathcal{X}}^*) = \inf_{\bar{\mathbf{x}}^* \in \bar{\mathcal{X}}^*} \|0 - \bar{\mathbf{x}}^*\|_2^2 = \inf_{\bar{\mathbf{x}}^* \in \bar{\mathcal{X}}^*} \sum_{i=1}^n \|\mathbf{U}^{(i)} \bar{\mathbf{x}}^*\|_2^2 \leq \frac{2nT}{3} \leq nT.$$

Finally, let  $\mathbf{y}^{(i)} = \mathbf{U}^{(i)} \mathbf{x} \in \mathbb{R}^T$ . If there exists  $\mathcal{I} \subset [n]$ ,  $|\mathcal{I}| > n/2$  and for each  $i \in \mathcal{I}$ ,  $\mathbf{y}_T^{(i)} = \dots = \mathbf{y}_{2T-1}^{(i)} = 0$ , then by Proposition 3.9, we have

$$\begin{aligned}\bar{F}(\mathbf{x}) - \inf_{\mathbf{z}} \bar{F}(\mathbf{z}) &\geq \frac{1}{\sqrt{n}} \sum_{i \in \mathcal{I}} [f_{\mathcal{N}_{sc}}(\mathbf{y}^{(i)}, \alpha, T) - \inf_{\mathbf{z}} f_{\mathcal{N}_{sc}}(\mathbf{z}, \alpha, T)] \\ &\geq \sqrt{n}/(16T).\end{aligned}\tag{A.1}$$

With above properties, we set the final functions as  $f_i(\mathbf{x}) = \lambda \bar{f}_i(\mathbf{x}/\beta)$ . We first consider any fixed index sequence  $\{i_t\}$ . For the case  $\epsilon \leq LB^2/(16\sqrt{n})$ , we set  $\lambda, \beta, T$  as

$$\lambda = \frac{B\sqrt{16\epsilon L}}{n^{3/4}}, \beta = \sqrt{\lambda/L}, T = \frac{B\sqrt{L}}{4n^{1/4}\epsilon^{1/2}},$$

Since Then by Lemma 5.2, we have that  $f_i \in \mathcal{V}^{(L)}$ ,  $F \in \mathcal{S}^{(0,L)}$ ,  $F(0) - \inf_{\mathbf{z}} F(\mathbf{z}) \leq \Delta$ . By Proposition 3.5, we know that for any algorithm output  $\mathbf{x}^{(t)}$  where  $t$  is less than

$$\frac{nT}{2} = 8n^{3/4} B \sqrt{\frac{L}{\epsilon}},\tag{A.2}$$

there exists  $\mathcal{I} \subset [n]$ ,  $|\mathcal{I}| > n - nT/(2T) = n/2$  and for each  $i \in \mathcal{I}$ ,  $\mathbf{y}_T^{(i)} = \dots = \mathbf{y}_{2T-1}^{(i)} = 0$ , where  $\mathbf{y}^{(i)} = \mathbf{U}^{(i)} \mathbf{x}^{(t)}$ . Thus,  $\mathbf{x}^{(t)}$  satisfies that

$$\bar{F}(\mathbf{x}^{(t)}) - \inf_{\mathbf{z}} \bar{F}(\mathbf{z}) \geq \lambda \sqrt{n}/(16T) \geq \epsilon,$$

where the first inequality holds due to (A.1). Then, applying Yao's minimax theorem, we have that for any randomized index sequence  $\{i_t\}$ , we have the lower bound (A.2). For the case  $LB^2/4 \geq \epsilon \geq LB^2/(16\sqrt{n})$ , by Lemma A.1 we know that there exists an  $\Omega(n)$  lower bound. Thus, with all above statements, we have the lower bound (4.2).  $\square$

**A.2. Proof of Theorem 4.7**

*Proof of Theorem 4.7.* Let  $\{\mathbf{U}^{(i)}\}_{i=1}^n \in \mathcal{O}(T+1, (T+1)n, n)$ . We choose  $\bar{f}_i(\mathbf{x}) : \mathbb{R}^{(T+1)n} \rightarrow \mathbb{R}$  as follows:

$$\bar{f}_i(\mathbf{x}) := Q(\mathbf{U}^{(i)}\mathbf{x}; \sqrt{\alpha}, T+1, 0) + \frac{\alpha}{n}\Gamma(\mathbf{U}\mathbf{x}),$$

$$\bar{F}(\mathbf{x}) := \frac{1}{n} \sum_{i=1}^n \bar{f}_i(\mathbf{x}).$$

We have the following properties. First, we claim that each  $\bar{f}_i \in \mathcal{S}^{(-\alpha c_\gamma/n, 4+\alpha c_\gamma/n)}$  because  $Q \in \mathcal{S}^{(0,4)}$  and  $\Gamma \in \mathcal{S}^{(-c_\gamma, c_\gamma)}$ . Next, note that

$$\begin{aligned} \bar{F}(\mathbf{x}) &= \frac{1}{n} \sum_{i=1}^n \bar{f}_i(\mathbf{x}) \\ &= \frac{1}{n} \sum_{i=1}^n [Q(\mathbf{U}^{(i)}\mathbf{x}; \sqrt{\alpha}, T+1, 0) + \alpha\Gamma(\mathbf{U}^{(i)}\mathbf{x})] \\ &= \frac{1}{n} \sum_{i=1}^n f_C(\mathbf{U}^{(i)}\mathbf{x}; \sqrt{\alpha}, T+1). \end{aligned}$$

Then we have

$$\begin{aligned} \bar{F}(0) - \inf_{\mathbf{x}} \bar{F}(\mathbf{x}) &= \frac{1}{n} \sum_{i=1}^n f_C(0; \sqrt{\alpha}, T+1) - \inf_{\mathbf{x}} \frac{1}{n} \sum_{i=1}^n f_C(\mathbf{U}^{(i)}\mathbf{x}; \sqrt{\alpha}, T+1) \\ &= \frac{1}{n} \sum_{i=1}^n [f_C(0; \sqrt{\alpha}, T+1) - \inf_{\mathbf{x}} f_C(\mathbf{x}; \sqrt{\alpha}, T+1)] \\ &\leq \sqrt{\alpha} + 10\alpha T, \end{aligned}$$

where the second equality holds due to the fact that  $\inf_{\mathbf{x}} \sum_{i=1}^n f_C(\mathbf{U}^{(i)}\mathbf{x}; \alpha, T) = \sum_{i=1}^n \inf_{\mathbf{x}} f_C(\mathbf{x}; \alpha, T)$ . Finally, let  $\mathbf{y}^{(i)} = \mathbf{U}^{(i)}\mathbf{x}$ . If there exists  $\mathcal{I}, |\mathcal{I}| > n/2$  and for each  $i \in \mathcal{I}, \mathbf{y}_T^{(i)} = \mathbf{y}_{T+1}^{(i)} = 0$ , then by Proposition 3.11, we have

$$\begin{aligned} \|\nabla \bar{F}(\mathbf{x})\|_2^2 &\geq \frac{1}{n^2} \sum_{i \in \mathcal{I}} \|\mathbf{U}^{(i)} \nabla [f_C(\mathbf{U}^{(i)}\mathbf{x}; \alpha, T)]\|_2^2 \\ &\geq \frac{1}{n^2} \frac{n}{2} (\alpha^{3/4}/4)^2 \\ &= \alpha^{3/2}/(32n). \end{aligned} \tag{A.3}$$

With above properties, we set the final functions  $f_i(\mathbf{x}) = \lambda \bar{f}_i(\mathbf{x}/\beta)$ . We first consider any fixed index sequence  $\{i_t\}$ . We set  $\alpha, \lambda, \beta, T$  as

$$\begin{aligned} \alpha &= \min \left\{ 1, \frac{5n\sigma}{c_\gamma L} \right\} \\ \lambda &= \frac{160n\epsilon^2}{L\alpha^{3/2}} \\ \beta &= \sqrt{5\lambda/L} \\ T &= \frac{\Delta L}{1760n\epsilon^2} \sqrt{\min \left\{ 1, \frac{5n\sigma}{c_\gamma L} \right\}}, \end{aligned}$$

Then by Lemma 5.2, we have that  $f_i \in \mathcal{S}^{(-\sigma, L)}$ ,  $F(0) - \inf_{\mathbf{z}} F(\mathbf{z}) \leq \Delta$  with the assumption that  $\epsilon^2 \leq \Delta L\alpha/(1760n)$ . By Proposition 3.5, we know that for any algorithm output  $\mathbf{x}^t$  where  $t$  is less than

$$\frac{nT}{2} = \frac{\Delta L}{3520\epsilon^2} \sqrt{\min \left\{ 1, \frac{5n\sigma}{c_\gamma L} \right\}}, \tag{A.4}$$

there exists  $\mathcal{I} \subset [n]$ ,  $|\mathcal{I}| > n - nT/(2T) = n/2$  and for each  $i$ ,  $\mathbf{y}_T^{(i)} = \mathbf{y}_{T+1}^{(i)} = \mathbf{0}$  where  $\mathbf{y}^{(i)} = \mathbf{U}^{(i)}\mathbf{x}^{(t)}$ . Thus, by (A.3),  $\mathbf{x}^{(t)}$  satisfies that

$$\|\nabla F(\mathbf{x}^{(t)})\|_2 \geq \lambda/\beta \cdot \sqrt{\alpha^{3/2}/(32n)} \geq \epsilon.$$

Applying Yao's minimax theorem, we have that for any randomized index sequence  $\{i_t\}$ , we have the lower bound (A.4), which implies (4.4). □

## B. Proofs of Technical Lemmas

### B.1. Proof of Lemma 5.1

*Proof of Lemma 5.1.* For any  $\mathbf{x}, \mathbf{y} \in \mathbb{R}^{mn}$ , we have that

$$\begin{aligned} \mathbb{E}_i \|\nabla \bar{g}_i(\mathbf{x}) - \nabla \bar{g}_i(\mathbf{y})\|_2^2 &= \frac{1}{n} \sum_{i=1}^n \|\nabla[\sqrt{n}g(\mathbf{U}^{(i)}\mathbf{x})] - \nabla[\sqrt{n}g(\mathbf{U}^{(i)}\mathbf{y})]\|_2^2 \\ &= \sum_{i=1}^n \|[\mathbf{U}^{(i)}]^\top \nabla g(\mathbf{U}^{(i)}\mathbf{x}) - [\mathbf{U}^{(i)}]^\top \nabla g(\mathbf{U}^{(i)}\mathbf{y})\|_2^2 \\ &= \sum_{i=1}^n \|\nabla g(\mathbf{U}^{(i)}\mathbf{x}) - \nabla g(\mathbf{U}^{(i)}\mathbf{y})\|_2^2 \\ &\leq \beta^2 \sum_{i=1}^n \|\mathbf{U}^{(i)}\mathbf{x} - \mathbf{U}^{(i)}\mathbf{y}\|_2^2 \\ &= \beta^2 \|\mathbf{x} - \mathbf{y}\|_2^2, \end{aligned}$$

where the third and last equality holds due to the fact that  $\mathbf{U}^{(i)}[\mathbf{U}^{(i)}]^\top = \mathbf{I}$  and  $\mathbf{U}^{(i)}[\mathbf{U}^{(j)}]^\top = \mathbf{0}$  for each  $i \neq j$ , and the inequality holds due to the fact that  $g \in \mathcal{S}^{(-\zeta, \zeta)}$ . Thus, we have  $\{\bar{g}_i\}_{i=1}^n \in \mathcal{V}^{(\zeta)}$ . To prove  $\bar{G} \in \mathcal{S}^{(\xi/\sqrt{n}, \zeta)}$ , we have

$$\nabla^2 \bar{G}(\mathbf{x}) = \frac{1}{\sqrt{n}} \sum_{i=1}^n \mathbf{U}^{(i)}(\mathbf{U}^{(i)})^\top \nabla^2 g(\mathbf{U}^{(i)}\mathbf{x}) \succeq \frac{\xi}{\sqrt{n}} \mathbf{I},$$

where the inequality holds due to the assumption that  $g \in \mathcal{S}^{(\xi, \beta)}$ . With this fact and  $\|\nabla \bar{G}(\mathbf{x}) - \nabla \bar{G}(\mathbf{y})\|_2^2 \leq \mathbb{E}_i \|\nabla \bar{g}_i(\mathbf{x}) - \nabla \bar{g}_i(\mathbf{y})\|_2^2 \leq \beta^2 \|\mathbf{x} - \mathbf{y}\|_2^2$  which implies that  $\nabla^2 \bar{G}(\mathbf{x}) \preceq \beta \mathbf{I}$ , we conclude that  $\bar{G} \in \mathcal{S}^{(\xi/\sqrt{n}, \zeta)}$ . □

### B.2. Proof of Lemma 5.2

*Proof of Lemma 5.2.* First we have  $\{g_i\}_{i=1}^n \in \mathcal{V}^{(\lambda/\beta^2 \cdot L')}$  because for any  $\mathbf{x}, \mathbf{y} \in \mathbb{R}^d$ ,

$$\begin{aligned} \mathbb{E}_i \|\nabla g_i(\mathbf{x}) - \nabla g_i(\mathbf{y})\|_2^2 &= \lambda^2 \mathbb{E}_i \|\nabla \bar{g}_i(\mathbf{x}/\beta) - \nabla \bar{g}_i(\mathbf{y}/\beta)\|_2^2 \\ &\leq \lambda^2/\beta^2 (L')^2 \|\mathbf{x}/\beta - \mathbf{y}/\beta\|_2^2 \\ &= (\lambda/\beta^2 \cdot L')^2 \|\mathbf{x} - \mathbf{y}\|_2^2. \end{aligned}$$

Next we have  $g_i \in \mathcal{S}^{(\lambda/\beta^2 \cdot \xi', \lambda/\beta^2 \cdot \zeta')}$  because  $\nabla^2 g_i(\mathbf{x}) = \lambda/\beta^2 \nabla^2 \bar{g}_i(\mathbf{x}/\beta)$  and for any  $\mathbf{x} \in \mathbb{R}^d$ ,

$$\lambda/\beta^2 \cdot \xi' \mathbf{I} \preceq \lambda/\beta^2 \nabla^2 \bar{g}_i(\mathbf{x}/\beta) \preceq \lambda/\beta^2 \cdot \zeta' \mathbf{I}.$$

Next we have  $G(0) - \inf_{\mathbf{x}} G(\mathbf{x}) \leq \lambda \Delta'$  because

$$G(0) - \inf_{\mathbf{x}} G(\mathbf{x}) = \lambda \bar{G}(0) - \lambda \inf_{\mathbf{x}} \bar{G}(\mathbf{x}) \leq \lambda \Delta'.$$

Finally we have  $\text{dist}(0, (\mathbf{Z}')^*) \leq \beta B'$  because  $(\mathbf{Z}')^* = \beta \cdot \mathbf{Z}^*$ . □

### B.3. Proof of Lemma 5.3

*Proof of Lemma 5.3.* Suppose the initial point  $\mathbf{x}^{(0)} = \mathbf{0}$ . Consider the following function  $\{\bar{f}_i\}_{i=1}^n, \bar{F} : \mathbb{R}^n \rightarrow \mathbb{R}$ , where

$$\begin{aligned}\bar{f}_i(\mathbf{x}) &:= -\sqrt{n}\langle \mathbf{x}, \mathbf{e}^{(i)} \rangle + \frac{\|\mathbf{x}\|_2^2}{2}, \\ \bar{F}(\mathbf{x}) &:= \frac{1}{n} \sum_{i=1}^n \bar{f}_i(\mathbf{x}),\end{aligned}$$

$\mathbf{e}^{(i)}$  is the  $i$ -th coordinate vector. We have that  $\{\bar{f}_i\}_{i=1}^n \in \mathcal{V}^{(1)}$  and the global minimizer of  $\bar{F}$  is

$$\mathbf{x}^* = \frac{1}{\sqrt{n}} \sum_{i=1}^n \mathbf{e}^{(i)}.$$

Thus we have  $\text{dist}(\mathbf{0}, \mathbf{x}^*) = 1$  and  $\bar{F}(\mathbf{0}) - \inf_{\mathbf{x}} \bar{F}(\mathbf{x}) = 1/2$ . Moreover, if point  $\mathbf{x}$  satisfies that  $|\text{supp}\{\mathbf{x}\}| \leq n/2$ , then

$$\bar{F}(\mathbf{x}) = \frac{\|\mathbf{x}\|_2^2}{2} - \frac{1}{\sqrt{n}} \sum_{i=1}^n \langle \mathbf{x}, \mathbf{e}^{(i)} \rangle = \frac{\|\mathbf{x}\|_2^2}{2} - \frac{1}{\sqrt{n}} \sum_{i \in \text{supp}\{\mathbf{x}\}} \langle \mathbf{x}, \mathbf{e}^{(i)} \rangle \geq -1/4,$$

which implies

$$\bar{F}(\mathbf{x}) - \inf_{\mathbf{x}} \bar{F}(\mathbf{x}) \geq 1/4. \quad (\text{B.1})$$

Next we choose  $f_i = \lambda \bar{f}_i(\mathbf{x}/\beta)$ , where  $\lambda = 2\Delta, \beta = \sqrt{2\Delta/L}$ , then we can check that  $\{f_i\}_{i=1}^n \in \mathcal{V}^{(L)}$ ,  $F(\mathbf{0}) - \inf_{\mathbf{x}} F(\mathbf{x}) \leq \Delta$ ,  $F \in \mathcal{S}^{(L,L)} \subset \mathcal{S}^{(\sigma,L)}$ . Moreover, since  $\nabla f_i(\mathbf{x}) = -\lambda\sqrt{n}\mathbf{e}^{(i)}/\beta + \lambda\mathbf{x}/\beta^2$ , then for some  $\mathbf{x}$ ,  $i$  is in the support set of  $\mathbf{x}$  only if  $f_i$  has been called. Thus, if less than  $n/2$  IFO calls have been made, then current point  $\mathbf{x}$  satisfies that  $|\text{supp}\{\mathbf{x}\}| \leq n/2$ . With (B.1), we have that  $F(\mathbf{x}) - \inf_{\mathbf{z}} F(\mathbf{z}) \geq \Delta/4 \geq \epsilon$ .  $\square$

### B.4. Proof of Lemma A.1

*Proof of Lemma A.1.* Suppose the initial point  $\mathbf{x}^{(0)} = \mathbf{0}$ . Consider the following function  $\{\bar{f}_i\}_{i=1}^n, \bar{F} : \mathbb{R}^n \rightarrow \mathbb{R}$ , where

$$\begin{aligned}\bar{f}_i(\mathbf{x}) &:= -\sqrt{n}\langle \mathbf{x}, \mathbf{e}^{(i)} \rangle + \frac{\|\mathbf{x}\|_2^2}{2}, \\ \bar{F}(\mathbf{x}) &:= \frac{1}{n} \sum_{i=1}^n \bar{f}_i(\mathbf{x}),\end{aligned}$$

$\mathbf{e}^{(i)}$  is the  $i$ -th coordinate vector. Then by the proof of Lemma 5.3, we know that  $\{\bar{f}_i\}_{i=1}^n \in \mathcal{V}^{(1)}$ ,  $\text{dist}(\mathbf{0}, \bar{\mathbf{x}}^*) = 1$  where  $\bar{\mathbf{x}}^*$  is the global minimizer of  $\bar{F}$  and for any  $\mathbf{x}$  satisfying  $|\text{supp}\{\mathbf{x}\}| \leq n/2$ ,

$$\bar{F}(\mathbf{x}) - \inf_{\mathbf{x}} \bar{F}(\mathbf{x}) \geq 1/4. \quad (\text{B.2})$$

Next we choose  $f_i = \lambda \bar{f}_i(\mathbf{x}/\beta)$ , where  $\lambda = LB^2, \beta = B$ , then we can check that  $\{f_i\}_{i=1}^n \in \mathcal{V}^{(L)}$ ,  $\text{dist}(\mathbf{0}, \mathbf{x}^*) = B$  where  $\mathbf{x}^*$  is the global minimizer of  $F$ ,  $F \in \mathcal{S}^{(L,L)} \subset \mathcal{S}^{(0,L)}$ . Moreover, since  $\nabla f_i(\mathbf{x}) = -\lambda\sqrt{n}\mathbf{e}^{(i)}/\beta + \lambda\mathbf{x}/\beta^2$ , then for some  $\mathbf{x}$ ,  $i$  is in the support set of  $\mathbf{x}$  only if  $f_i$  has been called. Thus, if less than  $n/2$  IFO calls have been made, then current point  $\mathbf{x}$  satisfies that  $|\text{supp}\{\mathbf{x}\}| \leq n/2$ . With (B.1), we have that  $F(\mathbf{x}) - \inf_{\mathbf{z}} F(\mathbf{z}) \geq \lambda/4 \geq \epsilon$ .  $\square$
